# Supplementary material for: Chemical nature of boron and nitrogen dopant atoms in graphene strongly influences its electronic properties
Source: Royal Society of Chemistry journal article supplement (doi:10.1039/c4cp01638f), 2014-01-01
Supplement: c4cp01638f1.pdf [file c4cp01638f1.pdf]

### Supporting Information

to

### Chemical Nature of Boron and Nitrogen Dopant Atoms in Graphene Strongly Influences its Electronic Properties

Petr Lazar<sup>a</sup>, Radek Zbořil<sup>a</sup>, Martin Pumera<sup>b</sup>, Michal Otyepka<sup>a\*</sup>,

<sup>a</sup> Department of Physical Chemistry, Regional Centre of Advance Technologies and Materials, Faculty of Science, Palacký University Olomouc, tř. 17. Listopadu 12, 771 46 Olomouc, Czech Republic

<sup>b</sup> Division of Chemistry & Biological Chemistry, School of Physical and Mathematical Sciences, Nanyang Technological University, Singapore 637371, Singapore

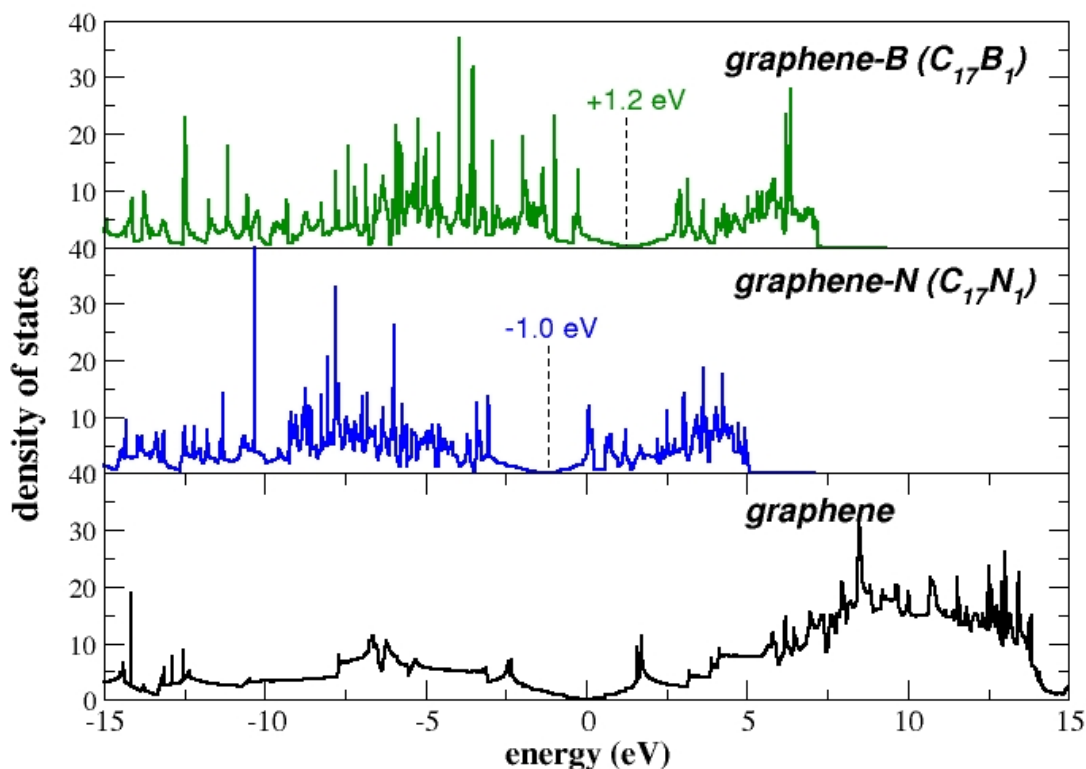

**Figure S1.** Density of states of B- and N-doped graphene calculated with the PBE functional.

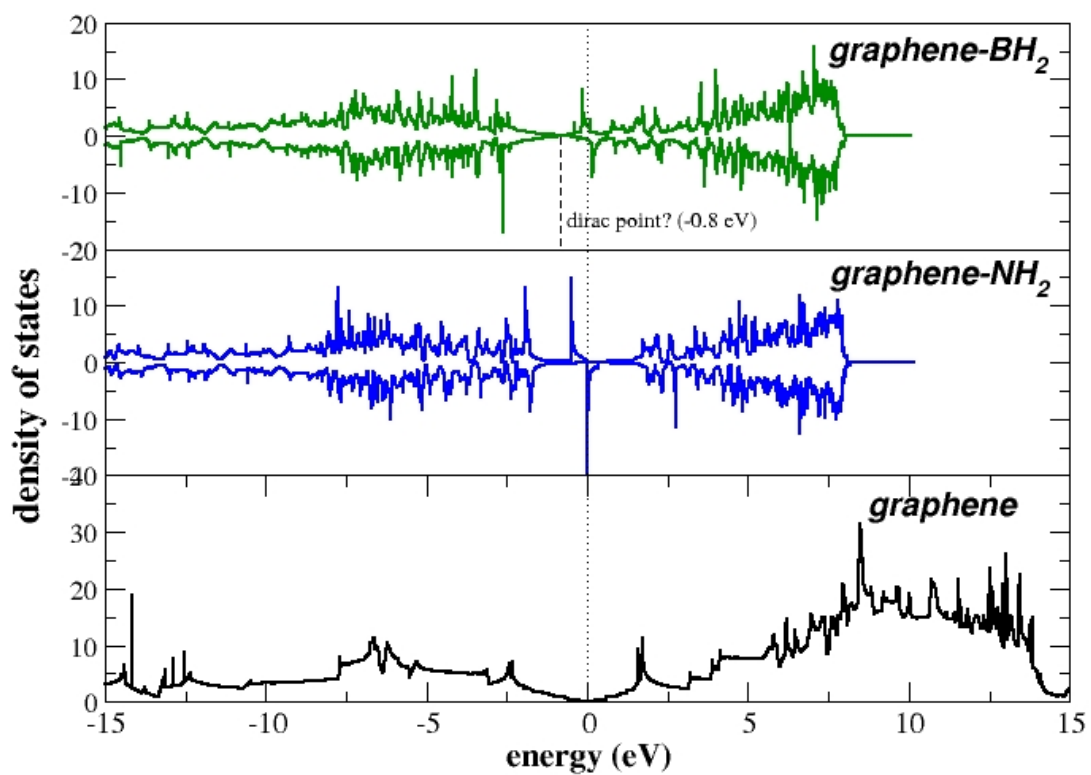

**Figure S2.** Density of states of BH<sub>2</sub> and NH<sub>2</sub>-doped graphene calculated with the PBE functional.
